# Supplementary material
Source: publisher figshare collection journal article supplement (https://acs.figshare.com/ndownloader/files/4529737)
Supplement: Supplementary file 1 [file 4529737]

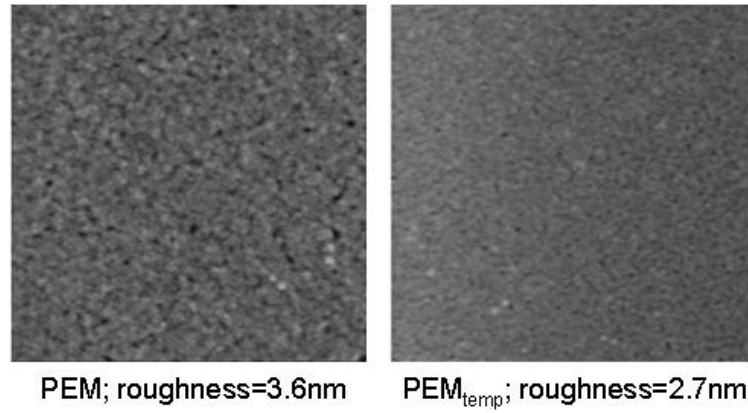

Figure . AFM pictures of PEM before glass-melt transition (left hand side) and PEM<sub>temp</sub> after glass-melt transition (right hand side); both samples measured in room temperature.

Calculation of the coverage of the surface by particles

$$n - \text{amount of particles adsorbed at the interface; } n = \frac{M}{m} = \frac{2.25 \cdot 10^{-7} \text{ g}}{1.38 \cdot 10^{-18} \text{ g}} = 1.63 \cdot 10^{11} / \text{cm}^2$$

Where:

$$M - \text{mass of the adsorbed layer; } M = 2.25 \cdot 10^{-7} \text{ g}$$

$$m - \text{mass of the single particle; } m = v \cdot \rho = \frac{4}{3} \pi r^3 \cdot \rho = 1.38 \cdot 10^{-18} \text{ g}$$

where:

$$v = \frac{4}{3} \pi r^3 - \text{volume of the single particle; } v = 2.68 \cdot 10^{-19} \text{ cm}^3$$

$$r = 4 \text{ nm} - \text{radius of a particle}$$

$\rho$  - density on magnetite;  $\rho = 5.15 \frac{g}{cm^3}$

$n_{\max}$  - maximal amount of particles adsorbed on the surface;  $n_{\max} = \frac{\theta_{\max}}{A} = 1.47 * 10^{12} / cm^2$

Where:

$\theta_{\max} = 74\%$  - maximal coverage of the surface by the ring-shape objects (based only on geometry; all interactions are neglected);  $\theta_{\max} = 0.74 cm^2$  per  $1 cm^2$

$A$  - surface occupied by a single particle;  $A = \pi r^2 = 5.024 \times 10^{-13} cm^2$

$\theta$  - coverage of the surface by particles;  $\theta = \frac{n}{n_{\max}} * 100\% = 11.1\%$
